# Supplementary material
Source: Springer Nature journal article supplement (https://www.springermedizin.de/resource/supplementary/13075_2012_3583_MOESM1_ESM.pdf/9694856)

Vertebra

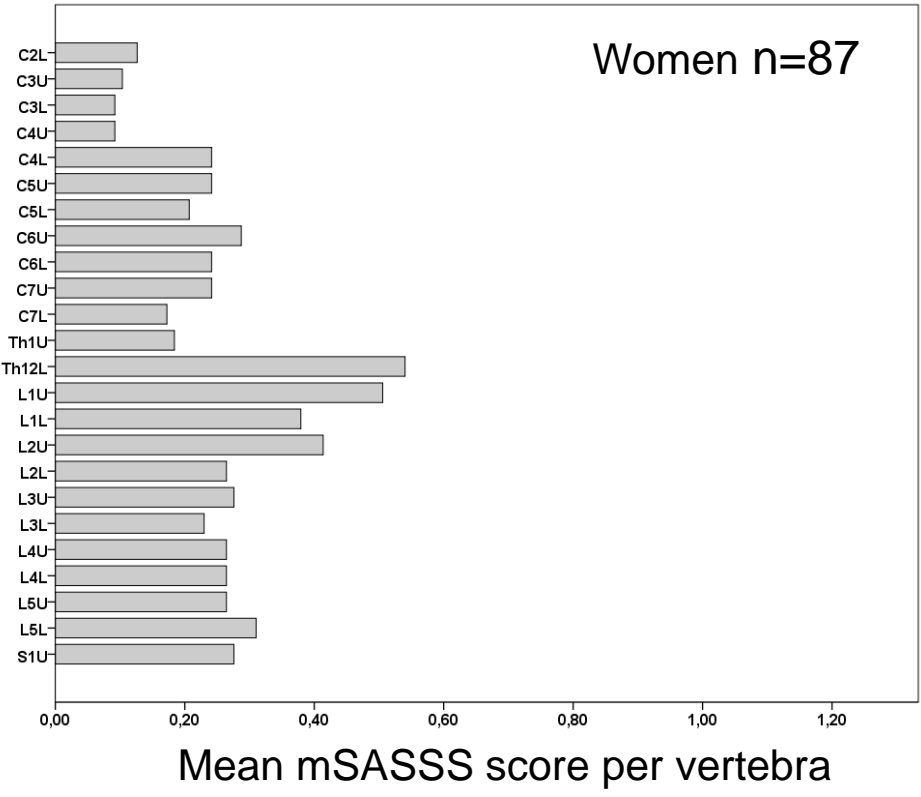

Vertebra

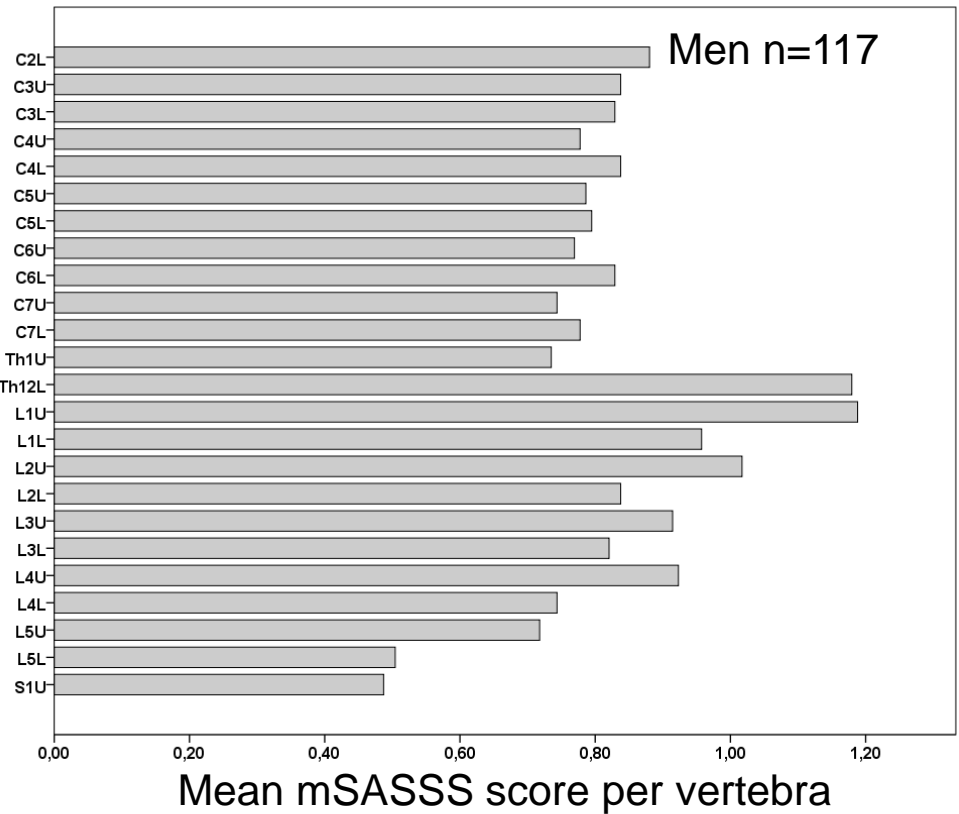

Supplement: MOESM1 [file 9694856]
